# Supplementary material
Source: publisher figshare collection journal article supplement (https://acs.figshare.com/ndownloader/files/11441876)
Supplement: Supplementary file 1 [file 11441876]

# Supporting Information

## Coherent Vibrational Wavepacket Dynamics in Platinum(II) Dimers and Their Implications

Pyosang Kim,<sup>1,2</sup> Matthew S. J. Kelley,<sup>2</sup> Arnab Chakraborty,<sup>3</sup> Nolan Wong,<sup>2</sup> Richard P. Van Duyne,<sup>2</sup>  
George C. Schatz,<sup>\*,2</sup> Felix N. Castellano,<sup>\*,3</sup> Lin X. Chen<sup>\*,1,2</sup>

<sup>1</sup>Chemical Science and Engineering Division, Argonne National Laboratory, Lemont, Illinois 60439, USA

<sup>2</sup>Department of Chemistry, Northwestern University, Evanston, Illinois 60208, USA

<sup>3</sup>Department of Chemistry, North Carolina State University, Raleigh, North Carolina 27695-8204, USA

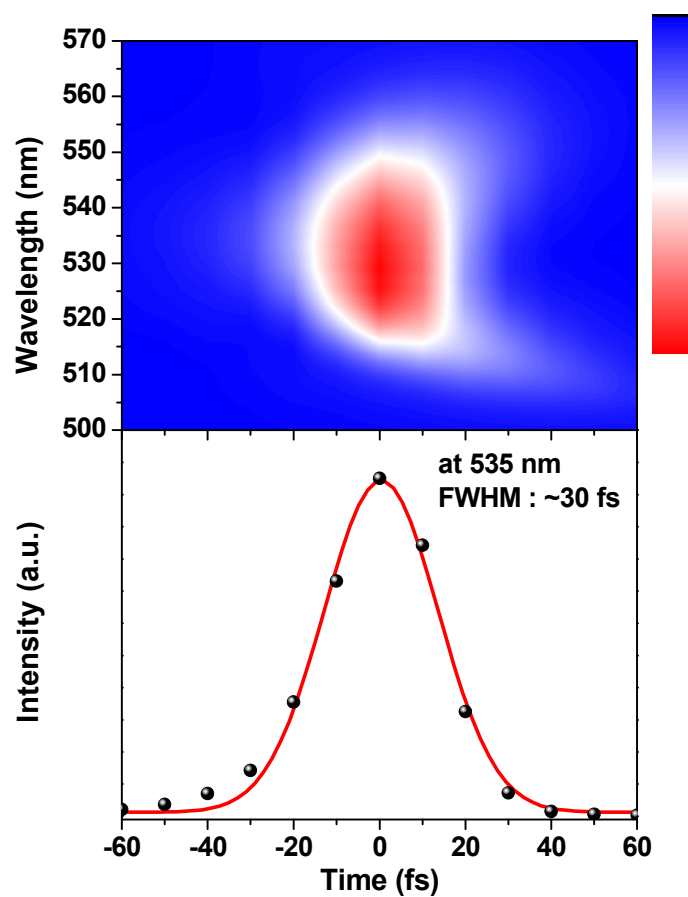

**Figure S1.** (Top) A contour plot of the transient grating signal of the optimally compressed pulses used in all TA measurements. (Bottom) The intensity profile probed at 535 nm.

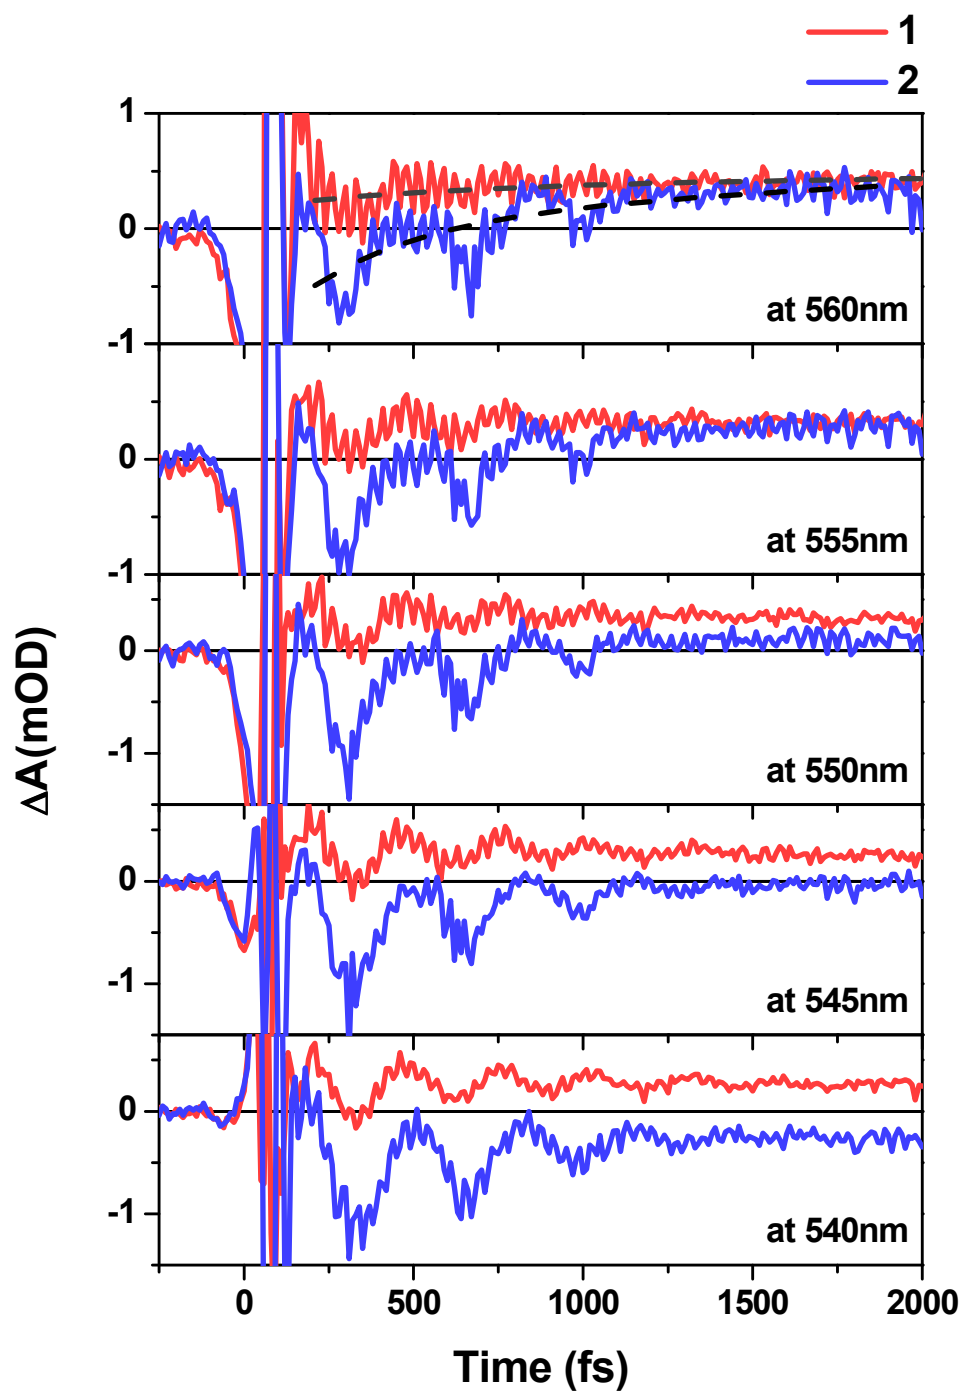

**Figure S2.** Magic angle TA kinetics traces at 540 ~ 560 nm for **1** (red) and **2** (blue) in THF at room temperature. The fit curves are only included in the data at 560 nm.

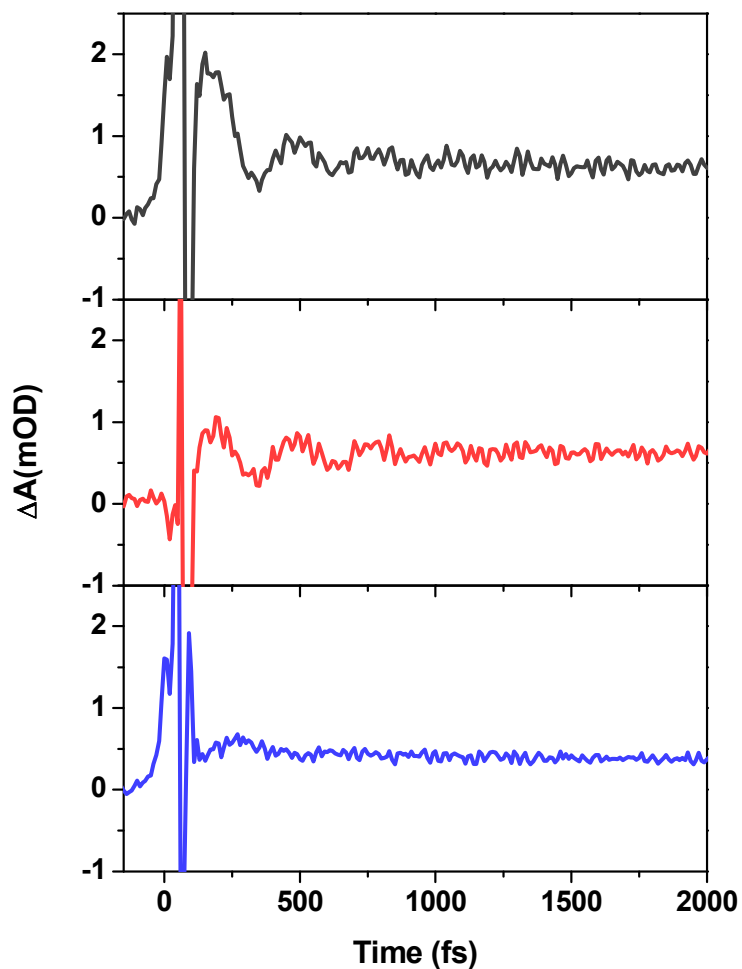

**Figure S3.** (Top) Magic angle TA kinetics trace of **1**. (middle) reconstructed magic angle TA trace of **1** from the equation  $I(t) = (I_{||}(t) + 2I_{\perp}(t)) / 3$ . (bottom) magic angle TA kinetics of **1** reconstructed from the sign-reversed  $I_{||}(t)$  in the aforementioned equation.

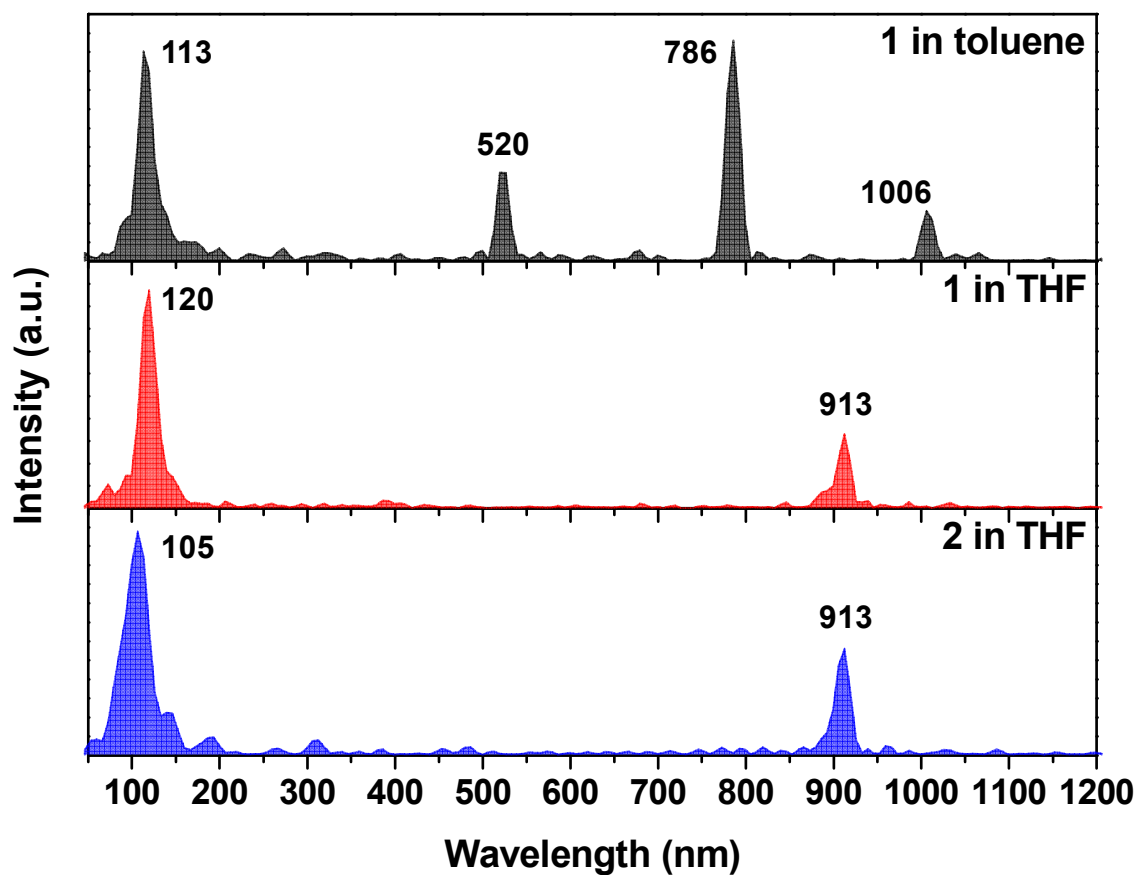

**Figure S4.** Fourier power spectra below  $1200\text{ cm}^{-1}$  at  $530\text{ nm}$ . The vibrational modes at  $913\text{ cm}^{-1}$  in THF and  $520$ ,  $786$  and  $1006\text{ cm}^{-1}$  in toluene indicate the vibrations of the solvents.

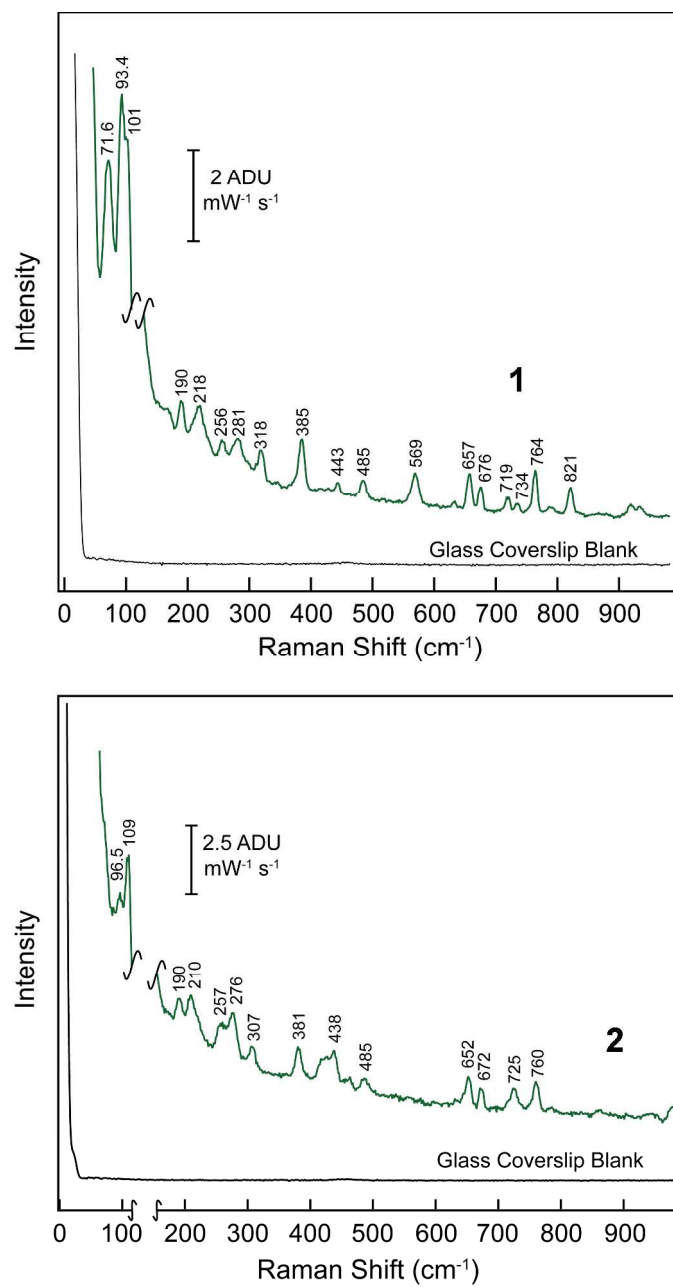

**Figure S5.** Solid powder Raman spectra for **1** and **2** with 800 nm excitation.
